# Supplementary material
Source: PubMed Central journal article supplement (PMC149396)
Supplement: 1476-069X-1-7-s1.pdf [file 1476-069X-1-7-s1.pdf]

Table 6. - Details regarding valuation estimates which appear in figures 1-3

| Reference                                   | Specific Endpoint        | Valuation <sup>a</sup><br>(1997 \$ Canadian) |       |       | Definition of Low, High <sup>b</sup> | Type of Estimate <sup>c</sup>                                    |
|---------------------------------------------|--------------------------|----------------------------------------------|-------|-------|--------------------------------------|------------------------------------------------------------------|
|                                             |                          | Central                                      | Low   | High  |                                      |                                                                  |
| <b>Emergency Department Visit (EDV)</b>     |                          |                                              |       |       |                                      |                                                                  |
| 44                                          |                          | 300                                          |       |       |                                      | WTP                                                              |
| 1                                           |                          | 630                                          | 320   | 950   | central +/- 50%                      | V <sub>T</sub>                                                   |
| current study                               | respiratory              | 2000                                         | 1700  | 2500  | 95% CI                               | V <sub>T</sub> , Includes value of subsequent hospital admission |
| current study                               | cardiac                  | 4400                                         | 3300  | 5600  | 95% CI                               | V <sub>T</sub> , Includes value of subsequent hospital admission |
| <b>Respiratory Hospital Admission (RHA)</b> |                          |                                              |       |       |                                      |                                                                  |
| 6                                           |                          | 3500                                         | 2900  | 4000  | CoT + low versus high<br>WTP         | CoT, WTP                                                         |
| current study                               |                          | 4200                                         | 3400  | 5000  | 95% CI                               | V <sub>T</sub>                                                   |
| 6                                           | > 65 years               | 5500                                         | 5000  | 6000  | CoT + low versus high<br>WTP         | CoT, WTP                                                         |
| 1                                           |                          | 6800                                         | 3500  | 10000 | central +/- 50%                      | V <sub>T</sub>                                                   |
| 7                                           |                          | 9200                                         | 9100  | 9400  | central +/- 1.96 SD of CoT           | CoT, LP                                                          |
| 44                                          |                          | 11000                                        |       |       |                                      | WTP                                                              |
| 7                                           | pneumonia                | 12000                                        | 12000 | 12000 | central +/- 1.96 SD of CoT           | CoT, LP                                                          |
| 7                                           | COPD <sup>d</sup>        | 12000                                        | 12000 | 13000 | central +/- 1.96 SD of CoT           | CoT, LP                                                          |
| 4                                           |                          | 26000                                        | 13000 | 52000 | expert judgment                      | V <sub>T</sub>                                                   |
| <b>Cardiac Hospital Admission (CHA)</b>     |                          |                                              |       |       |                                      |                                                                  |
| current study                               |                          | 5200                                         | 4000  | 6400  | 95% CI                               | V <sub>T</sub>                                                   |
| 1                                           |                          | 8700                                         | 4400  | 13000 | central +/- 50%                      | V <sub>T</sub>                                                   |
| 44                                          |                          | 11000                                        |       |       |                                      | WTP                                                              |
| 7                                           | congestive heart failure | 13000                                        | 12000 | 13000 | central +/- 1.96 SD of CoT           | CoT, LP                                                          |
| 7                                           | ischemic heart disease   | 16000                                        | 15000 | 16000 | central +/- 1.96 SD of CoT           | CoT, LP                                                          |

| Reference                            | Specific Endpoint | Valuation<br>1997 \$ Canadian |     |      | Definition of Low, High | Type of Estimate |
|--------------------------------------|-------------------|-------------------------------|-----|------|-------------------------|------------------|
|                                      |                   | Central                       | Low | High |                         |                  |
| <b>Asthma Symptom Day (ASD)</b>      |                   |                               |     |      |                         |                  |
| 44                                   |                   | 10                            |     |      |                         | WTP              |
| current study                        |                   | 28                            | 11  | 71   | 95% CI                  | WTP, LP          |
| 5                                    |                   | 35                            |     |      |                         | WTP              |
| 7                                    |                   | 48                            | 18  | 81   | expert judgment         | WTP              |
| 1                                    |                   | 52                            | 29  | 85   | low vs. high severity   | WTP              |
| <b>Restricted Activity Day (RAD)</b> |                   |                               |     |      |                         |                  |
| 5                                    |                   | 28                            |     |      |                         | WTP              |
| 3                                    | minor RAD         | 34                            | 22  | 56   | expert judgment         | WTP              |
| current study                        |                   | 48                            | 13  | 82   | 95% CI                  | WTP, LP          |
| 7                                    | minor RAD         | 57                            | 24  | 91   | expert judgment         | WTP              |
| 4                                    | minor RAD         | 61                            | 26  | 98   | expert judgment         | WTP              |
| 1                                    |                   | 79                            | 37  | 120  | central +/- 50%         | WTP              |
| 3                                    |                   | 79                            |     |      |                         | LP               |
| 44                                   |                   | 100                           |     |      |                         | WTP              |
| 7                                    | work loss day     | 120                           |     |      |                         | LP               |

| Reference                                   | Specific Endpoint                          | Valuation<br>1997 \$ Canadian |     |      | Definition of Low, High | Type of Estimate |
|---------------------------------------------|--------------------------------------------|-------------------------------|-----|------|-------------------------|------------------|
|                                             |                                            | Central                       | Low | High |                         |                  |
| <b>Acute Respiratory Symptom Day (ARSD)</b> |                                            |                               |     |      |                         |                  |
| 5                                           | cough                                      | 7                             |     |      |                         | WTP              |
| 7                                           | shortness of breath                        | 8                             | 0   | 16   | expert judgment         | WTP              |
| 44                                          |                                            | 10                            |     |      |                         | WTP              |
| current study                               | upper respiratory symptoms, eye irritation | 13                            | 0   | 28   | 95% CI                  | WTP, LP          |
| 1                                           |                                            | 15                            | 8   | 22   | expert judgment         | WTP              |
| 7                                           | lower respiratory symptoms                 | 18                            | 7   | 28   | expert judgment         | WTP              |
| 3                                           | multiple minor symptoms                    | 25                            | 11  | 56   | expert judgment         | WTP              |
| 43                                          | eye irritation                             | 25                            | 19  | 33   | 90% CI                  | WTP              |
| 7                                           |                                            | 27                            |     |      |                         | WTP              |
| 7                                           | upper respiratory symptoms                 | 28                            | 10  | 49   | expert judgment         | WTP              |
| 43                                          | mild cough                                 | 32                            | 25  | 41   | 90% CI                  | WTP              |
| 43                                          | mild shortness of breath                   | 32                            | 25  | 41   | 90% CI                  | WTP              |
| 43                                          | severe cough                               | 57                            | 42  | 74   | 90% CI                  | WTP              |
| 43                                          | severe shortness of breath                 | 98                            | 66  | 140  | 90% CI                  | WTP              |

<sup>a</sup>estimates rounded to maximum of 2 significant figures.

<sup>b</sup>SD=standard deviation, CI=confidence interval

<sup>c</sup>WTP=willingness to pay, LP=lost productivity, CoT=cost of treatment,  $V_T$ =total value

<sup>d</sup>COPD=chronic obstructive pulmonary disease
